# Supplementary material for: Combination of gallium(iii) with acetate for combating antibiotic resistant Pseudomonas aeruginosa
Source: Royal Society of Chemistry journal article supplement (doi:10.1039/c9sc01480b), 2019-01-01
Supplement: c9sc01480b1.pdf [file c9sc01480b1.pdf]

*Electronic Supplementary Information*

**Combination of gallium(III) with acetate for combating antibiotic resistant *Pseudomonas aeruginosa***

Yuchuan Wang,<sup>‡a,b</sup> Bingjie Han,<sup>‡a</sup> Yanxuan Xie,<sup>‡a</sup> Haibo Wang,<sup>‡b</sup> Runming Wang,<sup>b</sup> Wei Xia,<sup>a</sup> Hongyan Li,<sup>b</sup> Hongzhe Sun<sup>b,\*</sup>

<sup>a</sup> School of Chemistry, Sun Yat-sen University, 510275 Guangzhou, P. R. China

<sup>b</sup> Department of Chemistry, The University of Hong Kong, Pokfulam Road, Hong Kong, P. R. China

<sup>‡</sup>These authors contributed equally to this work.

\*Correspondence and requests for materials should be addressed to H.Z.S. (e-mail: [hsun@hku.hk](mailto:hsun@hku.hk)).

## Supplementary Methods

**Growth of *P. aeruginosa*.** *Pseudomonas aeruginosa* PAO1 was cultured in M9 minimal medium (Sigma), supplemented with 0.2% casein hydrolysate (Sigma) unless otherwise stated. Cells were grown at 37 °C on a culture shaker at 250 rpm to mid-log phase, then diluted with fresh culture medium to OD<sub>600</sub> of 0.1-0.2 and subjected to metal or metabolite treatment. Cells were harvested by centrifugation at 5,000 g for 15 mins at 4 °C for further experiments.

**Identification of Ga-binding proteins in *P. aeruginosa*.** Two different approaches were applied for proteome-wide identification of Ga-binding proteins in *P. aeruginosa*. The fluorescent probe Ga(III)-*TRACER* was prepared by reacting equimolar amounts of Ga(NO<sub>3</sub>)<sub>3</sub> with the fluorescent ligand NTA-AC in Tris buffer (20 mM Tris, 150 mM NaCl, pH 7.2), and the formation of Ga(III)-*TRACER* was confirmed by ESI-MS. To label Ga-binding proteins with the fluorescent probe Ga(III)-*TRACER*, *P. aeruginosa* liquid cultures grown to mid-log phase were incubated with 50 μM Ga(III)-*TRACER* at 37 °C in the dark for 30 mins. Cells were irradiated by UV light at 365 nm for 20 mins, and then centrifuged to obtain the cell pellets. An aliquot of *P. aeruginosa* cells resuspended in PBS (OD<sub>600</sub> = 0.3) was subjected to confocal imaging. Fluorescent and phase contrast images were captured by a Carl Zeiss LSM700 Inverted Confocal Microscope. The remaining cells were resuspended in Tris buffer and lysed by sonication. The soluble proteins were separated by SDS-PAGE. The silver-stained protein bands corresponding to the fluorescent spots were excised from the gel, subjected to trypsin digestion and analyzed by Orbitrap-LC-MS.

Ga-binding proteins in *P. aeruginosa* were also identified by Ga-IMAC experiments modified from previous study.<sup>1</sup> *P. aeruginosa* cells were lysed in ice-cold Buffer A (20 mM Tris, 300 mM NaCl, 1 mM TCEP, pH 7.6) and centrifuged (20,000 g, 20 mins) to remove cell debris. The bacterial protein extracts were diluted to *ca.* 2 mg/mL. A final concentration of 100 μM gallium nitrate solution was added to half of the protein extracts and was incubated at 4 °C for 4-5 hrs to pre-saturate the protein Ga-binding sites. The Ga-NTA column with a bed volume of 2 mL was washed thoroughly and equilibrated with Buffer A and then loaded with 10 mg of the Ga-treated and untreated protein extracts. After incubation at 4 °C overnight, on-column protein digestion was performed with the addition of trypsin (1:25 w/w, Sequencing Grade, Promega) in Buffer A and incubated at 37 °C for 1 hr. The unbound peptide fragments and excessive proteolytic enzymes were washed off with 10 C.V. of Buffer A, and the metal-binding peptides were finally eluted with

5 C.V. of Buffer A supplemented with 50 mM EDTA. After DTT and IAA treatment, the eluted peptides were desalted using C-18 reverse phase chromatography (Waters), which was performed immediately after IMAC separation to minimize peptide oxidation and modification. The desalted peptides eluted with 60% ACN, 0.1% TFA were freeze-dried overnight and re-dissolved in 5% ACN, 0.1% FA prior to Orbitrap-LC-MS analysis. The MS data were analyzed with MaxQuant for label-free quantification and proteins were searched against the UniProtKB/SwissPort database. Data were plotted with the fold change and significance of the LFQ intensity values generated from MaxQuant analysis.

**Expression and purification of *PaRpoB/C*.** The *rpoB* and *rpoC* genes were amplified by PCR from *P. aeruginosa* PAO1 with primer pairs RpoB(*Bam*HI)-for (5'-TAATGGATCCGATGGCTTACTCATACACTGAGAAAAA-3'), RpoB(*Hind*III)-rev (5'-ATTAAAGCTTTTATTCGGTTTCCAGTTCGATGTC-3'), RpoC(*Eco*RI)-for (5'-TAATGAATTCTTTGAAAGACTTGCTTAATCTGTTGAA-3') and RpoC(*Hind*III)-rev (5'-ATTAAAGCTTTTAGTTACCGCTCGAGTTCAGC-3') (the restriction sites are underlined). The digested DNA fragments were purified and ligated into the same digestion sites of pET-47b(+) vector. The constructed plasmids were sequenced to confirm that no mutation occurred during the manipulation. *Escherichia coli* BL21 (DE3) cells harboring the expression vector were grown in LB medium supplemented with kanamycin (30 µg/mL) at 37 °C to an OD<sub>600</sub> of 0.6-0.8, followed by the addition of 0.2 mM isopropyl β-D-thiogalactoside (IPTG) to induce protein overexpression. After further culture at 22 °C for 12 hrs, the cells were harvested by centrifugation (5,000 g, 20 min) and resuspended in Tris buffer B (20 mM Tris, 300 mM NaCl, pH 7.2). The cells were lysed by homogenization and sonication, and centrifuged (20,000 g, 30 mins) to remove cell debris. The cell lysates were then subjected to Ni-NTA resin (Thermo) equilibrated with Tris buffer B. The bound proteins were eluted by 500 mM imidazole-containing Tris buffer B, followed by Prescission Protease cleavage at 4 °C overnight. The proteins were further purified by HiTrap Heparin HP column (GE Healthcare).

**Characterization of Ga-binding to *PaRpoB/C*.** Isothermal titration calorimetry (ITC) experiments were carried out to characterize Ga(III) binding to purified *PaRpoB/C* in vitro. The EDTA-treated RpoB and RpoC proteins were desalted and prepared in Tris buffer C (20 mM Tris, 300 mM NaCl, 5 mM NaH<sub>2</sub>PO<sub>4</sub>, 2 mM sodium citrate, pH 7.6) with a final concentration of 20

μM. The Ga titrant solution was prepared by diluting Ga(NO<sub>3</sub>)<sub>3</sub> in the same Tris buffer C with final concentration of 1 mM. ITC experiments were performed on Malvern MicroCal ITC200 at 25 °C. The signals of Ga(III) titrated into Tris buffer C were recorded as background control. The ITC data were analyzed using the Origin software and fitted by one-set-of-sites binding model.

Cellular thermal shift assay (CETSA) was performed to evaluate Ga(III) binding to *PaRpoB/C* in intact bacterial cells. Control and Ga-treated *P. aeruginosa* cells were harvested and washed with chilled PBS for three times. Equal amounts of cell suspensions (*ca.* 10<sup>9</sup> cells) were aliquoted into PCR tubes and heated at different temperatures for 3 mins, followed by immediate cooling at room temperature for 3 mins, and the heat-cool cycles were repeated for three times. The cells were then lysed by three freeze-thaw cycles using liquid nitrogen, and were subsequently centrifuged at 20,000 g for 20 mins at 4 °C to pellet the precipitated proteins. The supernatants were separated by SDS-PAGE followed by western blot analysis using *PaRpoB* and *PaRpoC* polyclonal antibodies.

**Analysis of nascent mRNA transcripts in *P. aeruginosa*.** EU labeling experiments were performed according to the protocol of Click-iT Nascent RNA Capture Kit (Thermo). Briefly, bacterial cells at early log phase were pulsed with 0.5 mM 5-ethynyl uridine (EU) for 4 hrs in the presence of different metals or metabolites. Total RNA was isolated using SV Total RNA Isolation System (Promega) and used in a copper catalyzed click reaction with azide-modified biotin, and then binds to streptavidin magnetic beads provided by the kit. cDNA synthesis was performed with the nascent mRNA transcripts directly captured on the beads using VILO cDNA synthesis kit (Thermo) followed by analysis with RT-PCR. The primers used are listed in Table S2.

**GC-MS acquisition and data processing.** Bacterial metabolite extraction was performed as previously described<sup>2</sup> with some modifications. Bacterial cells after 4 hrs treatment were harvested by the same amount according to the measured OD<sub>600</sub>. After washing with cold 0.9% NaCl, cell pellets were resuspended in 1 mL cold methanol, with the addition of 5 μg ribitol (Sigma) as an internal standard. Cells were then lysed on a high-throughput Tissuelyser, and the supernatant was dried on a SpeedVac concentrator system (Thermo Fisher) for 5-6 hrs at room temperature.

The dried samples were then subjected to derivatization. Briefly, 80 μL of 20 mg/mL methoxylamine (Sigma) in pyridine was added and incubated for 90 mins at 37 °C, followed by

the addition of 80  $\mu$ L of N-methyl-N-trimethylsilyl trifluoroacetamide (MSTFA, Sigma) and incubated at 37 °C for another 30 mins. After centrifugation, the clear derivated samples were transferred to the GC-MS autosampler vial. Analysis was carried out on Agilent 7890AGC coupled to mass spectrometry 5975C equipped with a HP-5MS fused-silica capillary column (30 m  $\times$  0.25 mm i.d., film thickness 0.25  $\mu$ m, Agilent). Helium was employed as carrier gas with a constant flow rate of 1 mL/min. Electron impact ionization (EI) energy was 70 eV and the mass scan range was 33 - 550 m/z at a rate of 2 scan/s. 1  $\mu$ L of derivatized sample was injected to the injector at 280 °C. The initial column temperature was held for 3 mins at 85 °C and then ramped at 20 °C/min to 310 °C and held for 7 mins. For each tested group, six independent samples were analyzed.

The computational tool, eRah written in R language,<sup>3</sup> was employed to analyze the GC-MS data for spectral deconvolution, alignment, and metabolite quantification and identification. Metabolites were identified according to the reference spectra in Golm Metabolome Database (GMD), and National Institute of Standards and Technology (NIST) MS library. The resulting data matrix was normalized to the integrated peak area of ribitol in each sample. Principal component analysis (PCA) was applied to reduce the high dimension of the data set. One-way ANOVA followed by LSD post-hoc multiple comparisons test in SPSS statistics (version 24) was used to test the significance of metabolites. MetaboAnalyst 3.0 was employed to analyze the statistically enriched pathways over the identified metabolites.

**Exogenous metabolite/inhibitor addition assay.** Growth curves of *P. aeruginosa* were measured on Cytation3 multi-mode reader using the dynamics model. Bacteria grown to mid-log phase were diluted to OD<sub>600</sub> of 0.1 in 24-well plate, with the supplementation of appropriate doses of gallium nitrate and exogenous metabolites or inhibitors of TCA cycle (malonate) and ETC (sodium azide). A serial concentrations of metabolites were supplemented including amino acids (isoleucine, leucine, valine, proline, glutamic acid and phenylalanine) and different central carbon metabolites (fumarate, succinate,  $\alpha$ -ketoglutarate, citrate, malate, oxaloacetate, glyoxylate, pyruvate, acetate, gluconate, glucose, mannitol, fructose, arabinose and ribose) with a total carbon concentration of 60 mM. Plate was incubated at 37 °C in the plate reader with orbital shaking at 220 rpm. Bacterial growth was monitored for 12 hrs *via* OD<sub>600</sub> measurement at 30 mins intervals.

**Measurement of Ga uptake.** Bacterial cells were harvested at different time points by the same

amount according to the measured OD<sub>600</sub>. After washing with cold PBS containing 5 mM EDTA, cell pellets were digested with 70% HNO<sub>3</sub> (trace metal basis, Sigma) at 60 °C overnight. Samples were diluted to a final concentration of *ca.* 5% HNO<sub>3</sub> and analyzed by ICP-MS (iCAP RQ, Thermo Fisher).

**Measurement of NADH and NAD<sup>+</sup>.** The experiment was performed according to established protocols.<sup>4</sup> Briefly, to the harvested 10<sup>9</sup> bacterial cells, 200 µL of either 0.2 M HCl (for NAD<sup>+</sup> extraction) or 0.2 M NaOH (for NADH extraction) were added. After incubation at 55 °C for 10 mins, the samples were cooled on ice, and neutralized with 0.1 M NaOH or 0.1 M HCl. After centrifugation, 5 µL of clear supernatant from each sample were added to 90 µL of the reagent mix in a 96-well plate. The reagent mix contained 2× bicine buffer (1.0 M, pH 8.0), 1× water, 1× 40 mM EDTA, 1× 100% ethanol, 1× 4.2 mM thiazolyl blue, and 2× 16.6 mM phenazine ethosulphate. The colorimetric assay was initiated by the addition of 5 µL solution containing 1 mg/mL alcohol dehydrogenase II in 0.1 M bicine buffer (pH 8.0). The reaction was performed at 30 °C by recording the absorbance of reduced thiazolyl blue at 570 nm for 30 mins. The rate of increase in absorbance over time was used as the measure of NAD(H) concentration. A standard curve derived from known concentrations of NADH was assayed simultaneously.

**Measurement of ATP.** Cellular ATP contents of *P. aeruginosa* were measured with BacTiter-Glo Microbial Cell Viability Assay (Promega). Bacterial cells after 4 hrs treatment were harvested, washed with PBS and diluted to 10<sup>8</sup> cells/mL based on OD<sub>600</sub>. To an aliquot of 100 µL of bacterial suspension, 100 µL of BacTiter-Glo reagent were added. The mixture was incubated at room temperature for 15 mins, and luminescence was measured on Cytation 3 multi-mode reader (BioTek). A standard curve was prepared using serial dilutions of ATP in the range of 1 µM to 10 pM and measured simultaneously.

**Bacterial respiration.** Bacterial oxygen consumption rate (OCR) was quantified on an XF<sup>c</sup>96 Extracellular Flux Analyzer (Agilent). Before the XF assay, sensors were submerged into XF calibrant and kept in a non-CO<sub>2</sub> 37 °C incubator overnight for hydration. XF cell culture microplates were precoated with 2 µg poly-D-lysine (PDL) and dried overnight. *P. aeruginosa* cultures (in M9 medium) diluted to OD<sub>600</sub> of ~0.01 were added to the assay plate, and then centrifuged for 10 mins at 1,400 g for cell attachment. A volume of 6 µL gallium nitrate solution

with different concentrations was loaded into the injection ports. To assure uniform cellular seeding, basal OCR was measured for two cycles (2 mins mix, 2 mins wait, 3 mins measurement) before injection of the compound. After injection, 15 measuring cycles were performed. Each sample was tested in five replicate wells. Data were analyzed by Wave Desktop 2.2 software (Agilent).

**Persister assay.** Persister cells were prepared according to the previous studies.<sup>5, 6</sup> Briefly, *P. aeruginosa* overnight culture was diluted in LB broth and grown to OD<sub>600</sub> of 0.2~0.3. Cells were then diluted 1:1000 in 50 mL LB and grown for 16 hrs at 37 °C with 250 rpm shaking to obtain stationary phase cells. Cells were then treated with 10 µg/mL ciprofloxacin or 10 µg/mL ofloxacin for 4 hrs, and the remaining persister cells were washed with PBS and resuspended in M9 medium to OD<sub>600</sub> of 0.2. Growth of the persister cells exposed to Ga(NO<sub>3</sub>)<sub>3</sub> or metabolites in 24-well plate was monitored for 24 hrs on Cytation 3 multi-mode reader.

**Bacterial infection assay.** A549 cells (10<sup>5</sup> cells per well) were seeded in a 24-well plate in F-12 medium containing 10% fetal bovine serum (FBS) and 1% penicillin-streptomycin (PS). Cells were incubated at 37 °C in humidified 5% CO<sub>2</sub> atmosphere for 24 hrs to reach 80% confluence. Bacteria were added to cell monolayers at a multiplicity of infection (MOI) of 10 per cell in antibiotics-free cell culture medium, and the plates were centrifuged for 10 mins at 1,000 g. After 1 hr of infection at 37 °C, extracellular bacteria were removed by incubating the cells in 50 µg/mL gentamicin-containing F-12 medium for 1 hr, followed by extensive washing with PBS. The infected cells were then cultured for 24 hrs in the presence of Ga(NO<sub>3</sub>)<sub>3</sub>, Fe(NO<sub>3</sub>)<sub>3</sub> or sodium acetate (ACE), or the combination of metal with acetate. To examine the cell-associated bacteria, cells were lysed by sterilized 1% Triton X-100 in PBS, and the bacterial colonies in serial diluted cell lysates were enumerated by agar plating.

Bacterial cytotoxicity assay was performed according to the previous study.<sup>7</sup> A549 cells were pretreated with Ga(NO<sub>3</sub>)<sub>3</sub> or ACE, or their combination for 4 hrs. *P. aeruginosa* cells grown to mid-log phase in LB broth were diluted 1:10 in F-12 medium and induced at 37 °C for 1 hr. Infection was initiated by adding bacteria to A549 cells at MOI of 10. Morphology of the cells was captured by the inverted brightfield microscopy on Cytation 3 multi-mode reader. The percentage of live cells were determined by MTT assay. 1 mL of FBS-free F-12 medium containing 1% PS and 100 µL MTT solution (5 mg/mL) was added to each well, and the plates

were incubated for an additional 4 hrs. After careful removal of the medium, 1 mL DMSO was added to each well and the plate was shaken for 10 mins. The absorbance at 490 nm was measured.

**Murine wound infection model.** All experiments were performed in accordance with the guidelines approved by committee on the use of Live Animals in Teaching and Research (CULATR), the University of Hong Kong. The animals used were six-to-eight-week-old, female BALB/c mice (18-22g) purchased from Charles River Laboratories, Inc. The animals could freely access to food and water, and were randomized to cages for each experiment.

In the wound infection model, static overnight cultures of *P. aeruginosa* PAO1 were harvested and washed with PBS for three times before further use. An excisional wound (with an area of *ca.* 4 mm<sup>2</sup>) was created on the flank of each mouse. A number of  $5 \times 10^8$  CFU of bacteria in an aliquot of 10  $\mu$ L were dropped to the wound. Groups (n=5 for each group) of mice received monotherapy of Ga(NO<sub>3</sub>)<sub>3</sub> (2 mg/kg), ACE (1 g/kg), and the combination therapy of Ga(NO<sub>3</sub>)<sub>3</sub> and ACE. All the compounds were mixed in cream and smeared on the infection site twice daily post infection. Mice administrated with vehicle were set as the control. All the mice were sacrificed 48 hrs post infection and the infection sites were collected in an aliquot of 0.5 mL PBS and homogenized on Qiagen Tissue Lyser II at a frequency of 30 Hz for 5 mins. The bacterial loads per tissue were numerated by agar plating.

**Hemolysin assay.** Hemolysin levels in *P. aeruginosa* culture supernatants were determined referring to a previous protocol.<sup>8</sup> Briefly, rabbit blood cell was prepared by washing the defibrinated rabbit blood with BSA buffer (20 mM KH<sub>2</sub>PO<sub>4</sub>, 150 mM NaCl, 1 mM MgCl<sub>2</sub>, 1 mg/ml BSA) twice, and then centrifuged at 2,000 g for 2 mins to remove the precipitates. *P. aeruginosa* cells grown at 37 °C for 20 hrs in the absence or presence of studied compounds were collected and centrifuged at 12,000 g at 4 °C for 5 mins. An aliquot of 0.4 mL bacterial supernatant was diluted to 1 mL with BSA buffer and mixed with 20  $\mu$ L of freshly defibrinated rabbit blood cell. After incubation at 37 °C for 25 mins, intact blood cells were removed by centrifugation at 5,500 g for 1 min at room temperature and the optical densities of the supernatants were measured at 543 nm to determine the extracted hemolysin levels.

**Transcriptome sequencing and data processing.** *P. aeruginosa* cells after 4 hrs treatment with 80  $\mu$ M Ga(NO<sub>3</sub>)<sub>3</sub> or 30 mM ACE, or their combination were harvested for transcriptome



sequencing. After extraction of the total RNA, bacterial rRNAs were removed by RiboMinus<sup>TM</sup> transcriptome isolation kit (Thermo Fisher). Libraries were prepared with VAHTS<sup>TM</sup> total RNA-seq (H/M/R) library prep kit (Vazyme). RNA (3 µg) was fragmented and subjected to first- and second-strand synthesis, 3'-end adenylation, adaptor ligation and PCR amplification. After purification of the PCR products, library quality was checked on an Agilent 2100 Bioanalyzer.

For gene expression arrays, quality control and quantification of gene expression levels were performed with HTSeq v0.6.1. The raw data were firstly processed through in-house perl scripts to remove adapter-containing, poly-N-containing and low quality reads, and the clean reads were mapped to the reference genome of *P. aeruginosa* PAO1. After counting the reads numbers mapped to each gene, FPKM (Fragments Per Kilobase of transcript sequence per Millions base pairs sequenced) of each gene was calculated based on the length of the gene and the reads count mapped to this gene. Differential expression analysis between two groups was performed using the DESeq R package (1.18.0), which determines differential gene expressions using a model based on the negative binomial distribution. The resulting *p*-values were adjusted using the Benjamini and Hochberg's method for false discovery rate (FDR) control. Differentially expressed genes were selected with an adjusted *p*-value < 0.05.

**Isotope tracer experiment.** To track the metabolic flux of acetate in the absence and presence of Ga(III), nontargeted isotope fate detection (NTFD) analysis was performed as previously described.<sup>9, 10</sup> *P. aeruginosa* cells grown to log phase were diluted to OD<sub>600</sub> of 0.3 with M9 medium in the absence or presence of 80 µM Ga(NO<sub>3</sub>)<sub>3</sub>, with the supplementation of 30 mM unlabeled ACE or 1:1 mixture of unlabeled and [U-<sup>13</sup>C<sub>2</sub>] labeled ACE (total 30 mM). Bacterial cells were harvested after 4 hrs incubation at 37 °C and the metabolites were extracted and analyzed according to the methods described in GC-MS acquisition. Three biological replicates were performed for each growth condition.

The detection of stable isotope labeled metabolites was executed using the NTFD software which provides the mass isotopomer distributions (MID) data of all labeled compounds detected in the GC-MS data.<sup>11</sup> Effectiveness of each tracer was identified from the MID data. The identification of labeled metabolites was carried out by the chemstation of Agilent combined with the NIST database. Both the spectrum obtained from the labeled chromatogram and the spectrum obtained from the unlabeled chromatogram was normalized by their total signals.

**Growth of *P. aeruginosa* PAO1 transposon mutants.** Selected strains with transposon insertions on studied genes were obtained from the *P. aeruginosa* PAO1 transposon mutant library (University of Washington). After confirming the mutants by PCR using flanking primers and transposon specific primers, strains were stocked in LB medium containing 5% DMSO (v/v). Growth curves of the mutant strains in the presence of Ga(NO<sub>3</sub>)<sub>3</sub> (20 µM) or ACE (30 mM) or their combinations were measured on Cytation3 multi-mode reader. Strains were cultured in M9 medium at 37 °C in 24-well plate without the supplementation of antibiotics.

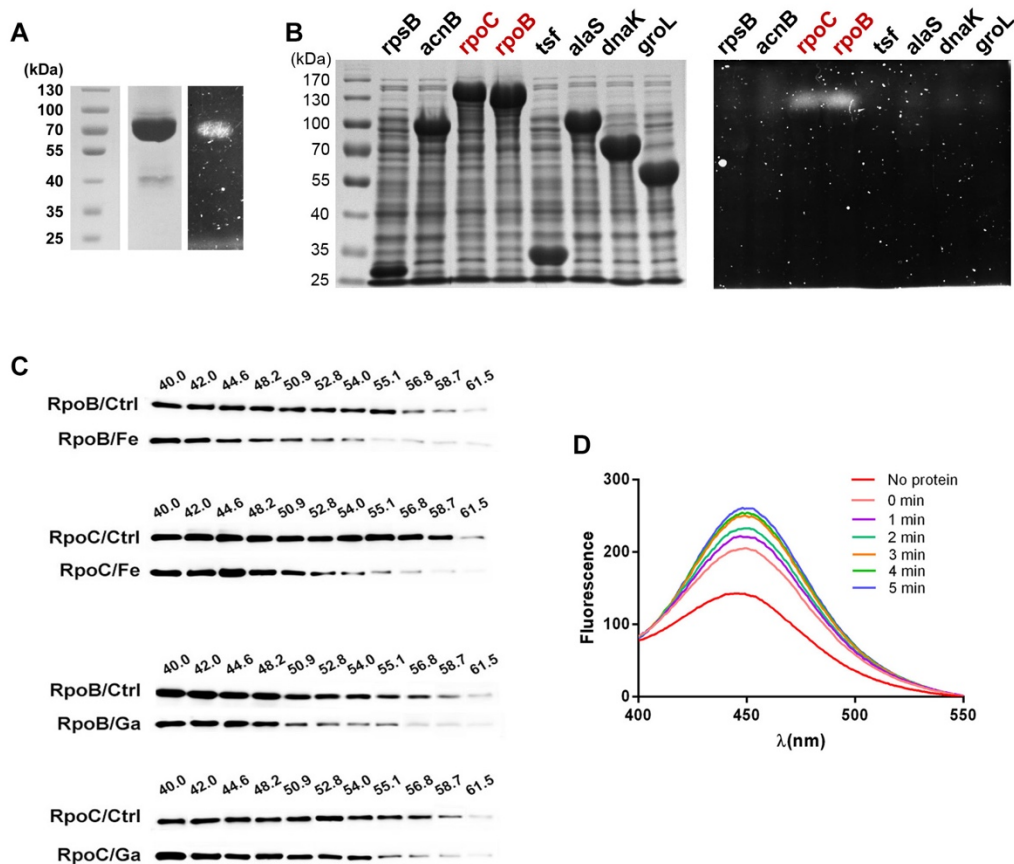

**Fig. S1** (A) Fluorescent labelling of apo-lactoferrin by Ga(III)-TRACER on a SDS-PAGE gel. After incubating the probe with apo-hLF in a 1:1 molar ratio, samples were subjected to UV irradiation at 365 nm for 10 mins to allow the formation of covalent bond between the probe and protein prior to SDS-PAGE analysis. (B) Fluorescent labeling of Ga-binding proteins by Ga(III)-TRACER on a SDS-PAGE gel. The proteins enriched by Ga-IMAC with high scores were overexpressed in *E. coli* BL21. *PaRpoB* and *PaRpoC* could be fluorescent labeled by Ga(III)-TRACER, indicating binding of Ga(III) to the two proteins in cells. (C) Representative western blot results of Ga(III)-targeting proteins evaluated by CETSA. (D) Time-dependent fluorescence spectra of Ga(III)-TRACER (1  $\mu$ M) after the addition of *PaRpoB* (10  $\mu$ M). The binding of Ga(III)-TRACER to *PaRpoB* led to ca. 2-fold fluorescence enhancement within 5 mins.

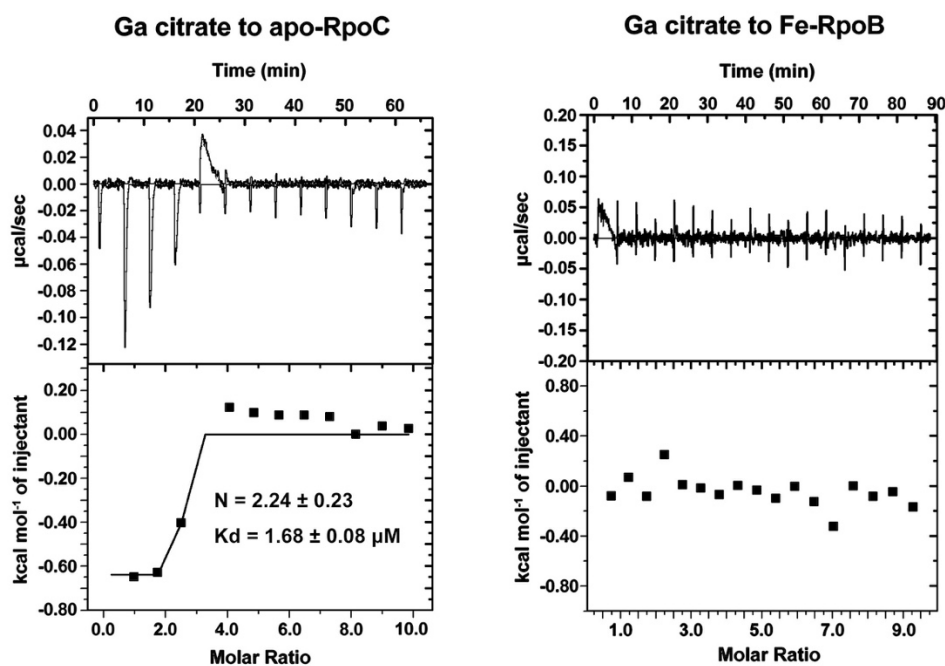

**Fig. S2** Calorimetric titration of gallium citrate (1 mM) to apo-RpoC (*Left*) and Fe-RpoB (*Right*). Fe(III) bound to RpoB was in a molar ratio of 2:1. The protein concentration of 20  $\mu\text{M}$  was used in the experiments. The titration curve of Ga(III) to apo-RpoC was fitted to a one-set-of-sites binding model using Origin software.

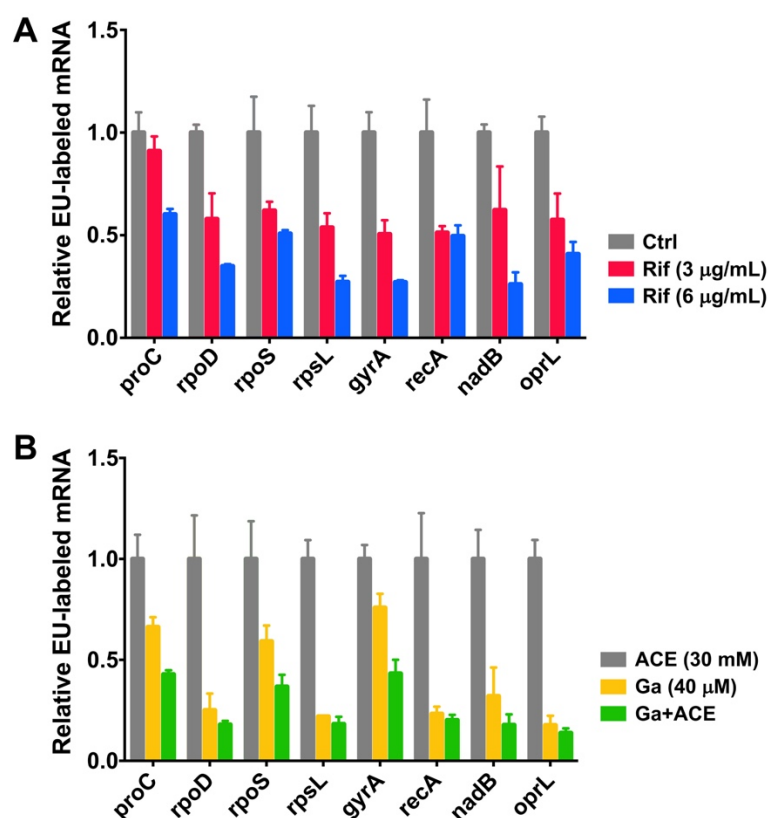

**Fig. S3** Analysis of EU-labeled mRNA levels from *P. aeruginosa* treated with different concentrations of rifamycin (A) or Ga(NO<sub>3</sub>)<sub>3</sub> and sodium acetate (B). Rifamycin and Ga(III) treatment lead to obvious decrease of nascent mRNA levels of the selected house-keeping genes, indicative of inhibited bacterial transcription.

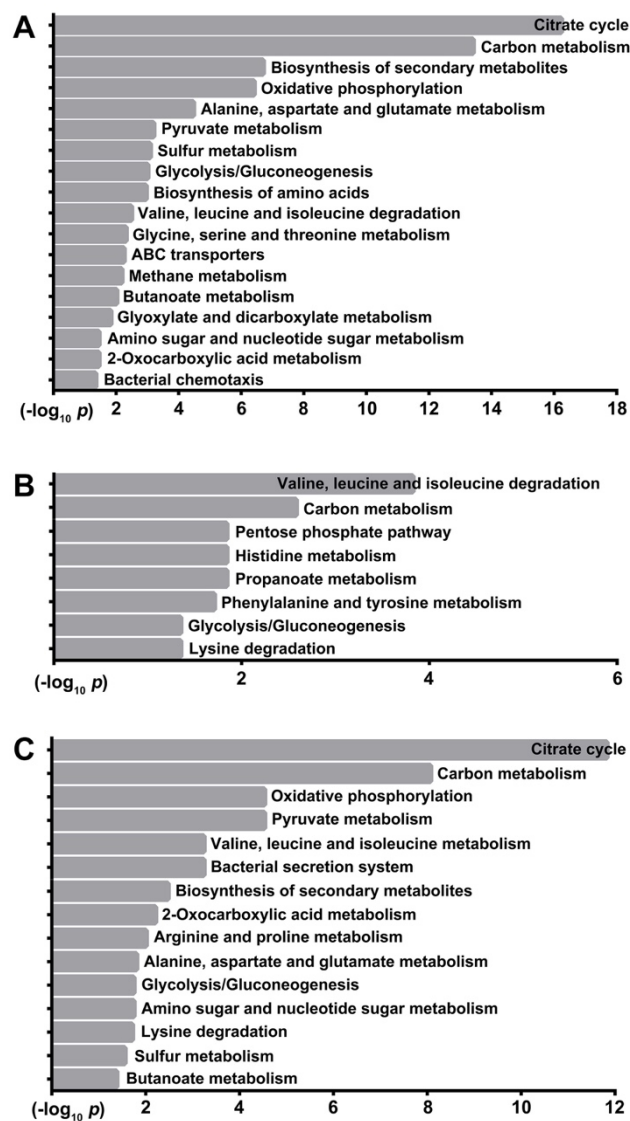

**Fig. S4** Pathway enrichment analysis of differentially regulated gene transcriptions in *P. aeruginosa* upon treatment with 80  $\mu\text{M}$   $\text{Ga}(\text{NO}_3)_3$  (A) or 30 mM ACE (B) or combination (C).

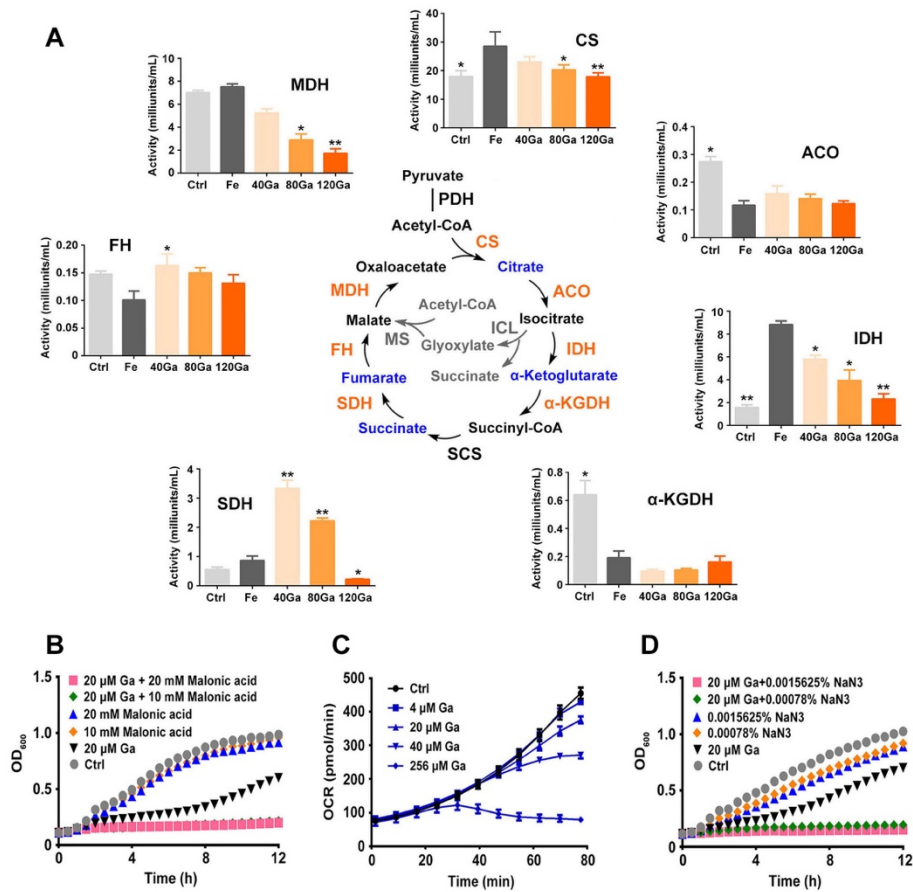

**Fig. S5** Ga(III) treatment inhibits *P. aeruginosa* TCA cycle activity and attenuates bacterial respiration. (A) Effect of Ga(III) on enzyme activities in *P. aeruginosa* TCA cycle. Dose-dependent decrease in the enzyme activities were generally detected. The experimental groups are corresponding to non-treated control (Ctrl), 10 μM Fe(III) (Fe), 10 μM Fe(III) and 40 μM Ga(III) (40Ga), 10 μM Fe(III) and 80 μM Ga(III) (80Ga), 10 μM Fe(III) and 120 μM Ga(III) (120Ga) treatment conditions. The asterisks indicate significant difference from the 10 μM Fe(III) treatment group (\*,  $0.01 < p < 0.05$ ; \*\*,  $p < 0.01$ ) (B) TCA cycle inhibition by malonate on the inhibitory effect of Ga(III). (C) Real time changes in oxygen consumption rate (OCR) of *P. aeruginosa* in response to Ga(III) treatment. (D) ETC inhibition by NaN<sub>3</sub> on the inhibitory effect of Ga(III).

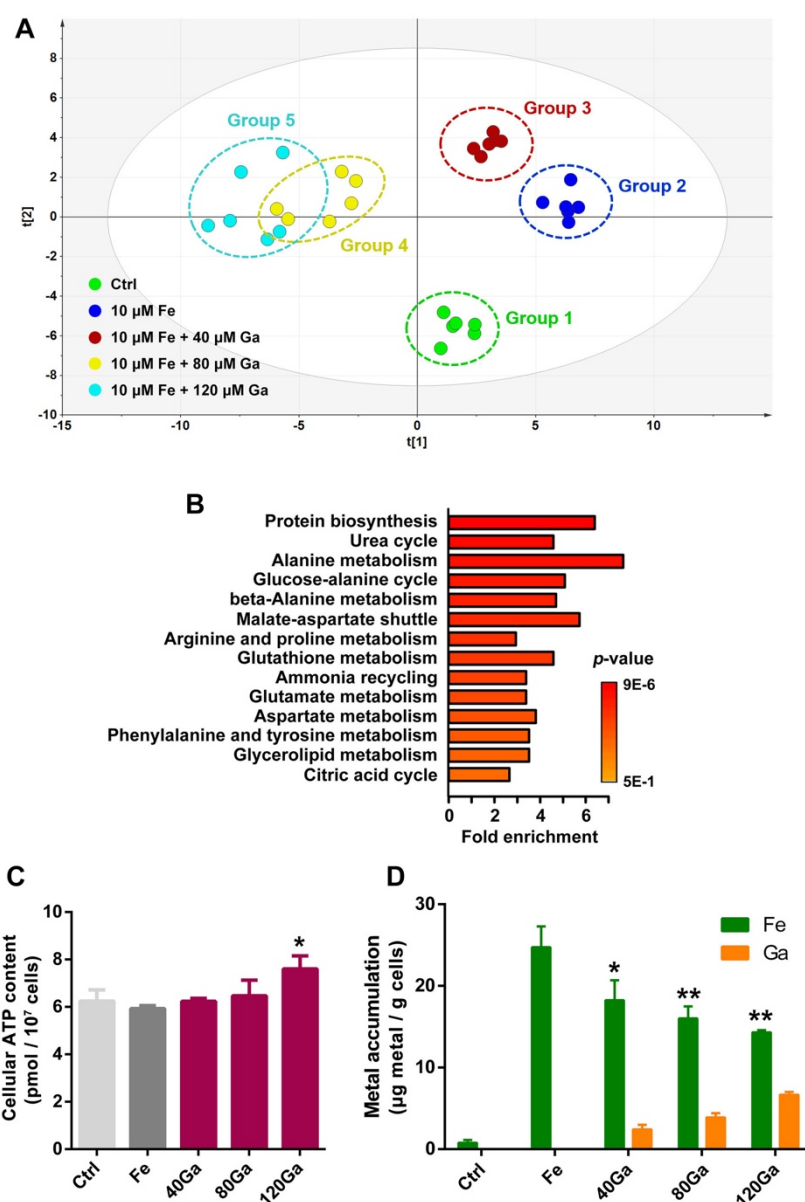

**Fig. S6** (A) PCA analysis of GC-MS profiles obtained from control, Fe- and Ga-treated *P. aeruginosa* metabolite extracts. Each dot represents the metabolome profiling data from one individual sample. The metabolite profiles of *P. aeruginosa* under different Fe- and Ga-treatment conditions could be clearly separated. (B) Pathway enrichment analysis based on differentially regulated metabolites. (C) ATP content and (D) metal accumulation of *P. aeruginosa* under different Fe(III) and Ga(III) treatment conditions. The asterisks indicate significant difference from the 10  $\mu$ M Fe(III) treatment group (\*,  $0.01 < p < 0.05$ ; \*\*,  $p < 0.01$ ). The experimental groups are corresponding to non-treated control (Ctrl), 10  $\mu$ M Fe(III) (Fe), 10  $\mu$ M Fe(III) and 40  $\mu$ M Ga(III) (40Ga), 10  $\mu$ M Fe(III) and 80  $\mu$ M Ga(III) (80Ga), 10  $\mu$ M Fe(III) and 120  $\mu$ M Ga(III) (120Ga) treatment conditions.





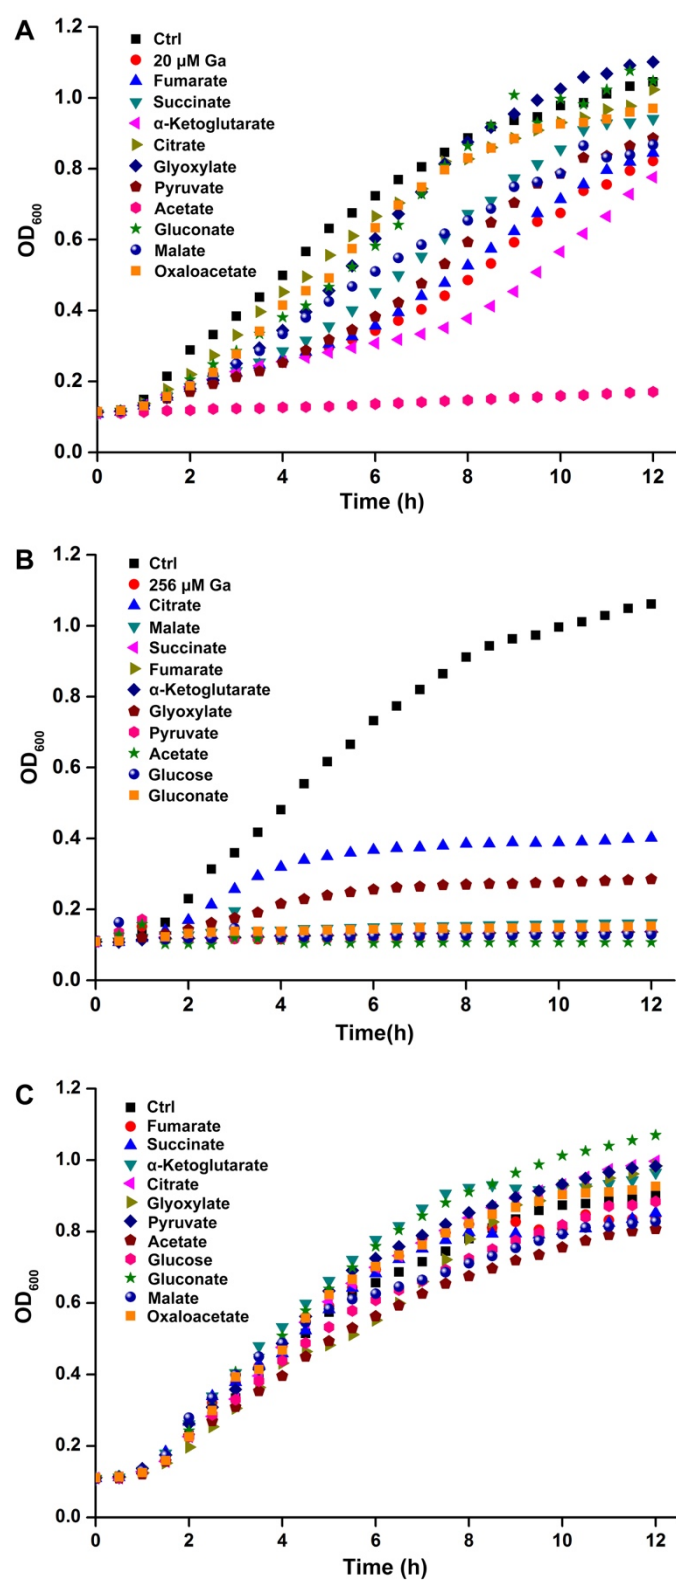

**Fig. S8** Growth curves of *P. aeruginosa* in the presence of various central carbon metabolites with the supplementation of low (A) or high (B) concentrations of  $\text{Ga}(\text{NO}_3)_3$ , or metabolites alone (C). The supplemented metabolites are with a total carbon concentration of 60 mM. Data show one representative result of three independent experiments.

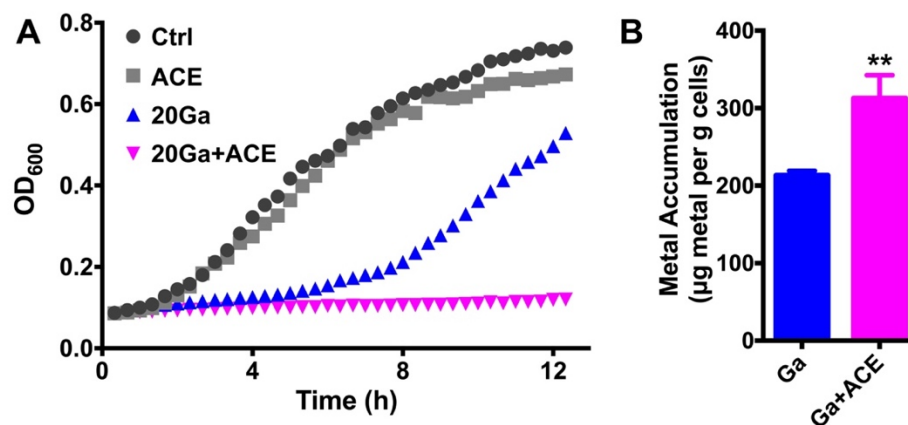

**Fig. S9** Acetate enhances the antimicrobial activity of Ga(III) on a clinical isolated *P. aeruginosa* strain through increased Ga uptake. (A) Growth curves of *P. aeruginosa* clinical isolated strain in the presence of Ga(III) (20  $\mu$ M) or the combination with acetate (30 mM). (B) Bacterial Ga accumulation. Clinical *P. aeruginosa* strain grown to OD = 0.2 were subjected to Ga(III) (80  $\mu$ M) or the combined treatment for 4 h, and *ca.*  $1 \times 10^{10}$  cells were collected for the determination of Ga content.

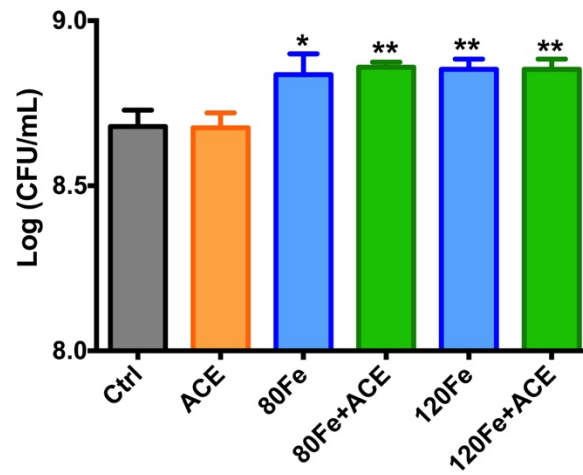

**Fig. S10** A549 cell-associated bacterial colony counts in the *P. aeruginosa* cell infection model. The infected cells were cultured in the presence of  $\text{Fe}(\text{NO}_3)_3$  (80  $\mu\text{M}$  or 120  $\mu\text{M}$ ) or sodium acetate (ACE, 30 mM), or their combinations. The asterisks indicate significant difference from the control group (\*,  $0.01 < p < 0.05$ ; \*\*,  $p < 0.01$ )

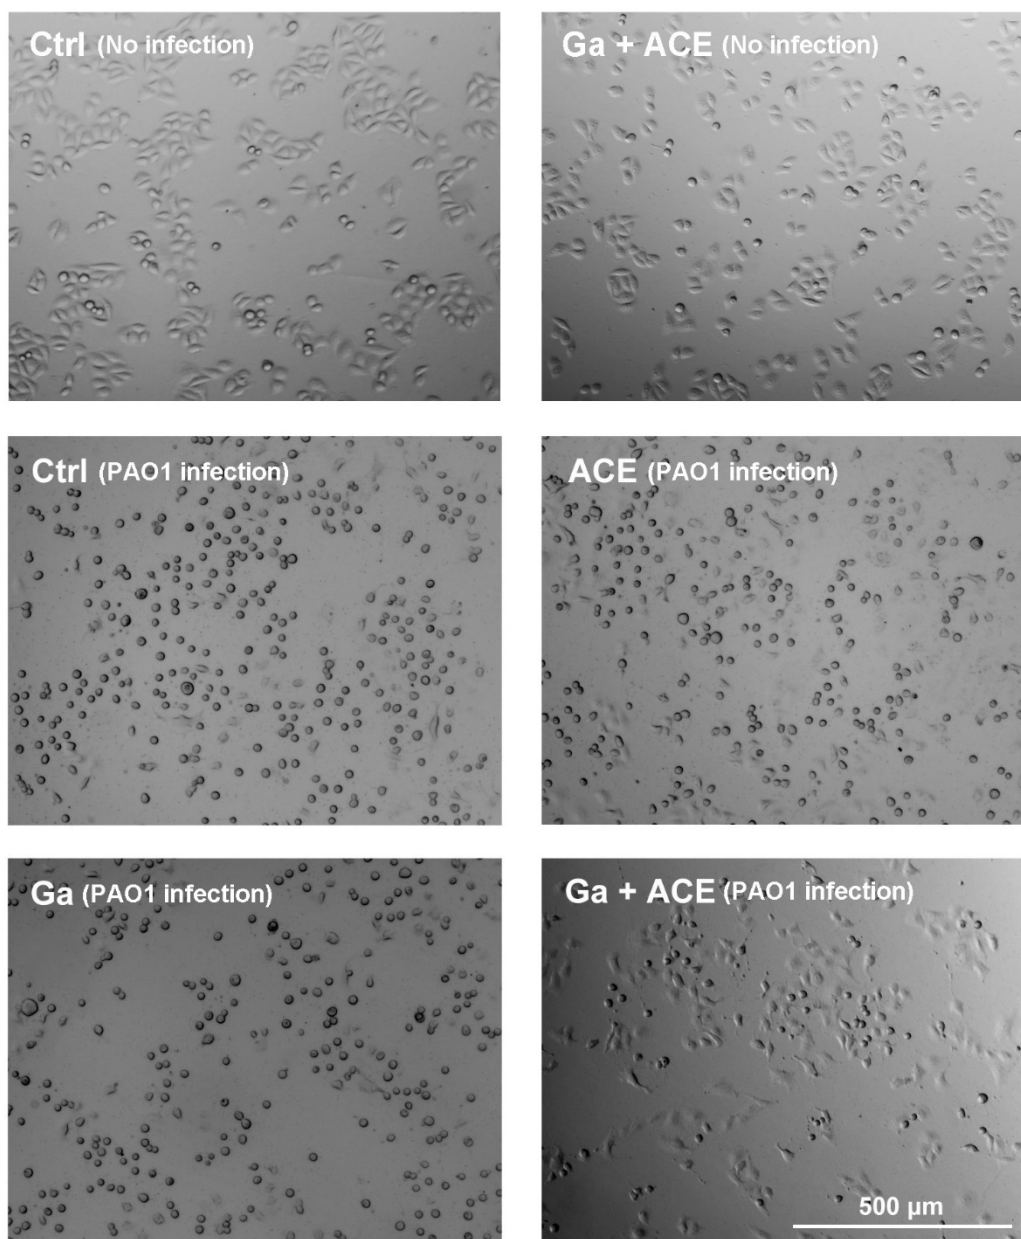

**Fig. S11** Combined use of Ga(III) and acetate reduced the cytotoxic effect of *P. aeruginosa* in A549 cells. Images were captured using the  $4 \times$  magnification objective of the microscopy on Cytation 3 reader. The four *P. aeruginosa* infection groups (4 h infection) are corresponding to untreated control (Ctrl), 30 mM acetate (ACE), 80  $\mu$ M Ga(III) (Ga), and 80  $\mu$ M Ga(III) and 30 mM acetate (Ga+ACE). Upon *P. aeruginosa* infection, reduced cell death was observed in the presence of both Ga(III) and acetate.

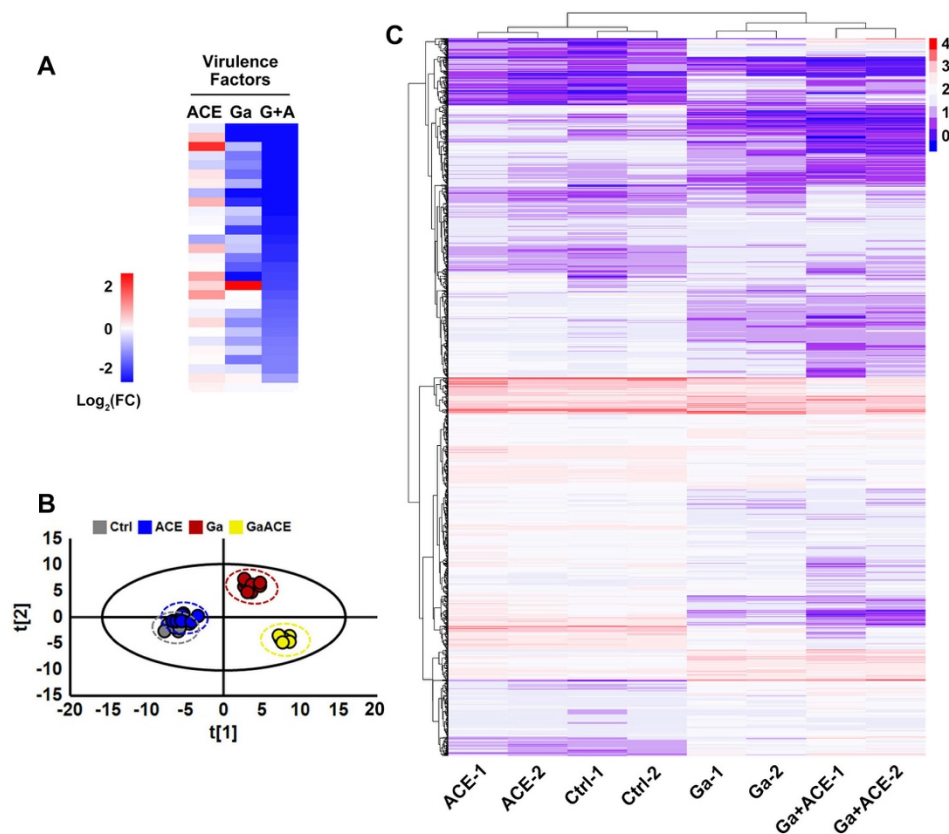

**Fig. S12** Transcriptomic and metabolomic features of *P. aeruginosa* in response to gallium or acetate or their combinations. (A) Transcription profiles of genes encoding virulence factors of *P. aeruginosa* upon treatment with Ga(NO<sub>3</sub>)<sub>3</sub> (80 μM) or sodium acetate (30 mM) or their combinations for 4 hrs. Values are reported as log<sub>2</sub> fold changes over untreated control (corresponding to data in Supplementary Table 4). (B) Principal component analysis (PCA) score plot of control and treatment groups. (C) Cluster analysis of differentially regulated gene transcriptions in control and treatment groups of *P. aeruginosa*. The cluster map was created based on the normalized log<sub>10</sub>(FPKM) values.

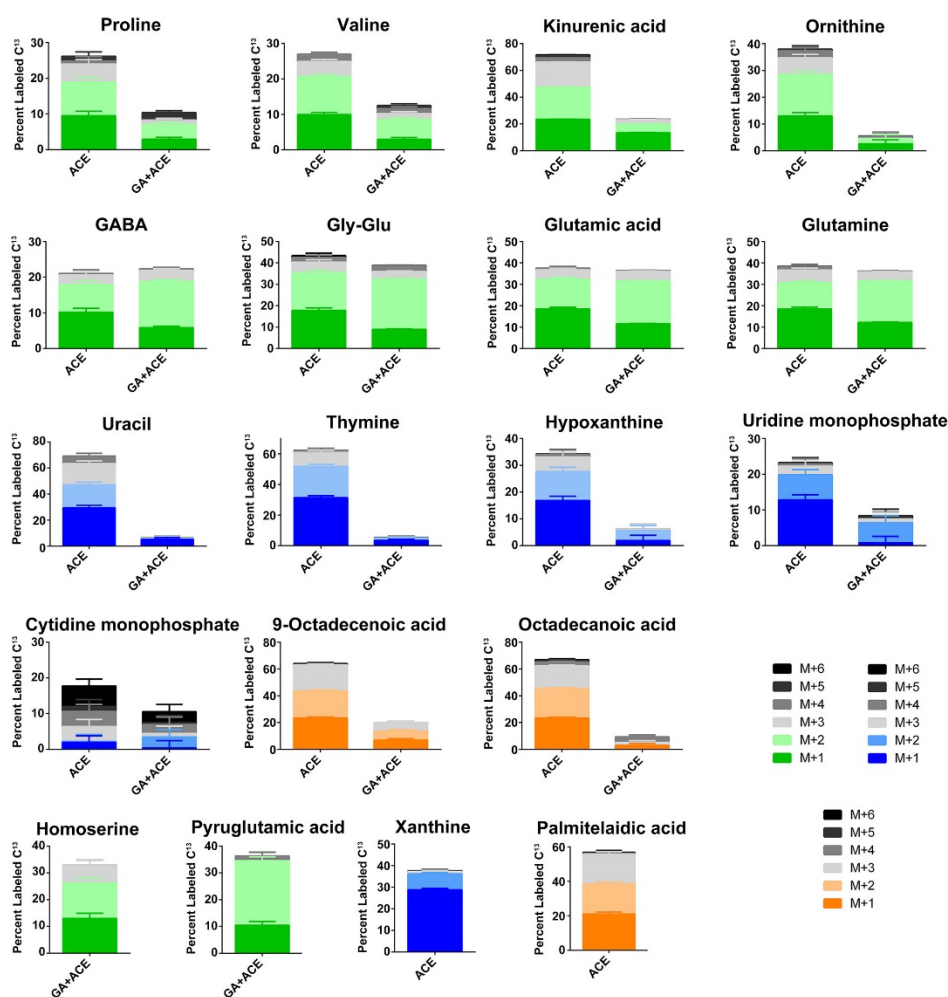

**Fig. S13** Mass isotopomer distributions of  $^{13}\text{C}_2$ -acetate detected in various metabolites upon treatment with or without  $\text{Ga}(\text{NO}_3)_3$  (80  $\mu\text{M}$ ). The metabolites colored in green belong to amino acids, blue to nucleotides and orange to fatty acids.

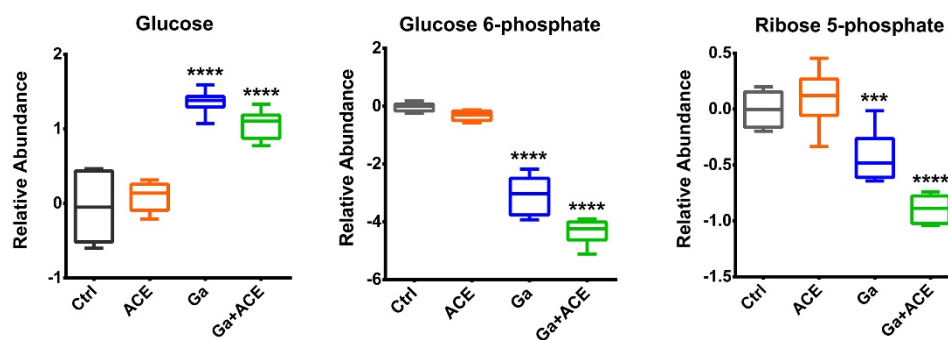

**Fig. S14** Relative abundance of key metabolites in glycolysis and pentose phosphate pathway upon treatment with  $\text{Ga}(\text{NO}_3)_3$  (80  $\mu\text{M}$ ) or ACE (30 mM) or their combinations. The asterisks indicate significant difference from the control group (\*\*\*,  $0.0001 < p < 0.001$ ; \*\*\*\*,  $p < 0.0001$ ).



**Table S1.** Peptide mass fingerprints of *Pa*RpoB and *Pa*RpoC analyzed by Orbitrap LC-MS

| Uniprot ID | Gene Name   | Protein Name                                    | Protein MW<br>(kDa) | Peptide Sequence | Charge | Peptide Mass<br>(Da) |
|------------|-------------|-------------------------------------------------|---------------------|------------------|--------|----------------------|
| Q9HWC9     | <i>rpoC</i> | DNA-directed<br>RNA polymerase<br>subunit beta' | 154.3               | HLNVFEGEQVNR     | 3      | 1441.72              |
|            |             |                                                 |                     | LGIQAFEPVLIEGK   | 2      | 1513.86              |
|            |             |                                                 |                     | FATSDLNDLYR      | 2      | 1314.63              |
|            |             |                                                 |                     | YIVNEIQDVYR      | 2      | 1411.72              |
|            |             |                                                 |                     | IGLASPEMIR       | 2      | 1086.60              |
|            |             |                                                 |                     | SVITVGPTLR       | 2      | 1042.63              |
| Q51561     | <i>rpoB</i> | DNA-directed<br>RNA polymerase<br>subunit beta  | 150.7               | STGSYSLVTQQPLGGK | 2      | 1622.84              |
|            |             |                                                 |                     | APEDVTLMDVSPK    | 2      | 1401.69              |
|            |             |                                                 |                     | LQQGDDLAPGVLK    | 2      | 1353.74              |
|            |             |                                                 |                     | IVEGATFER        | 2      | 1021.53              |
|            |             |                                                 |                     | YDLSAVGR         | 2      | 880.45               |

**Table S2.** Primers used for RT-PCR analysis

| Gene ID | Gene        |     | Sequence (5'-3')        |
|---------|-------------|-----|-------------------------|
| PA0393  | <i>proC</i> | For | CAGGCCGGGCAGTTGCTGTC    |
|         |             | Rev | GGTCAGGCGCGAGGCTGTCT    |
| PA0576  | <i>rpoD</i> | For | GGGCGAAGAAGGAAATGGTC    |
|         |             | Rev | CAGGTGGCGTAGGTGGAGAA    |
| PA3622  | <i>rpoS</i> | For | CTCCCCGGGCAACTCCAAAAG   |
|         |             | Rev | CGATCATCCGCTTCCGACCAG   |
| PA4268  | <i>rpsL</i> | For | GCAAGCGCATGGTCGACAAGA   |
|         |             | Rev | CGCTGTGCTCTTGCAGGTTGTGA |
| PA3168  | <i>gyrA</i> | For | TGTGCTTTATGCCATGAGCGA   |
|         |             | Rev | TCCACCGAACCGAAGTTGC     |
| PA3617  | <i>recA</i> | For | AGATCATCGATCTGGGCGTG    |
|         |             | Rev | TGGTCGCGAATGGTCTTCTC    |
| PA0761  | <i>nadB</i> | For | CGATGTACTGGTCATCGGCA    |
|         |             | Rev | GGTGGTATTCGAAGCTGCCT    |
| PA0973  | <i>oprL</i> | For | CGTGCGATCACCACCTTCTA    |
|         |             | Rev | CTCGCCCAGAGCCATATTGT    |

**Table S3.** Metabolites identified by GC-MS in *P. aeruginosa* PAO1

| Identified Compound                     | PubChem CID | <i>p</i> -value * | Average Integrated Peak Area |         |          |          |          |
|-----------------------------------------|-------------|-------------------|------------------------------|---------|----------|----------|----------|
|                                         |             |                   | Ctrl                         | 10 Fe   | 40 Ga    | 80 Ga    | 120 Ga   |
| Pyridine, 2-hydroxy- (1TMS)             | 8871        | 0.511             | 682246                       | 1037531 | 983616   | 887125   | 905251   |
| Lactic acid (2TMS)                      | 107689      | 0.000             | 3656989                      | 988792  | 1732014  | 5783190  | 7722360  |
| L-Alanine (3TMS)                        | 5950        | 0.000             | 4538491                      | 1900318 | 9062271  | 5597338  | 6141267  |
| Glycolic acid (2TMS)                    | 757         | 0.359             | 4516184                      | 3194322 | 3391943  | 3002132  | 3414117  |
| Phosphoric acid monomethyl ester (2TMS) | 13130       | 0.016             | 1604714                      | 910143  | 1740276  | 1629000  | 1276147  |
| Valine (2TMS)                           | 6287        | 0.000             | 447716                       | 60417   | 1062645  | 8352568  | 8375696  |
| Butanoic acid, 4-hydroxy- (2TMS)        | 10413       | 0.000             | 3445                         | 12401   | 38651    | 72406    | 91519    |
| Norvaline, DL- (2TMS)                   | 824         | 0.588             | 1021266                      | 777397  | 1098288  | 798010   | 943445   |
| Ethanolamine (3TMS)                     | 700         | 0.002             | 1235399                      | 5790962 | 13029588 | 12138870 | 15302595 |
| Propane-1,2-diol (2TMS)                 | 1030        | 0.000             | 3555                         | 2027    | 1127021  | 1578303  | 531293   |
| Isoleucine (2TMS)                       | 6306        | 0.000             | 393                          | 348     | 490      | 822542   | 3128453  |
| Proline (2TMS)                          | 145742      | 0.000             | 624                          | 727     | 877      | 657008   | 1420780  |
| Glycine (3TMS)                          | 750         | 0.000             | 5890060                      | 6457828 | 11766319 | 16479837 | 14967721 |
| Heneicosanoic acid (1TMS)               | 16898       | 0.661             | 960976                       | 1003295 | 1313036  | 922016   | 993518   |
| Succinic acid (2TMS)                    | 1110        | 0.000             | 800479                       | 599249  | 1143453  | 2093834  | 2399872  |

|                                    |        |       |          |          |           |          |          |
|------------------------------------|--------|-------|----------|----------|-----------|----------|----------|
| Fumaric acid, 2-methyl-(2TMS)      | 638129 | 0.000 | 1306331  | 3545107  | 3695692   | 1293421  | 1506272  |
| Uracil (2TMS)                      | 1174   | 0.000 | 1002949  | 184327   | 1071890   | 1923566  | 2607799  |
| Fumaric acid (2TMS)                | 444972 | 0.000 | 709956   | 472893   | 288900    | 697500   | 904782   |
| Benzoic acid, 3,4-dihydroxy-(3TMS) | 72     | 0.000 | 205696   | 458866   | 440899    | 230670   | 221772   |
| Homovanillic acid (2TMS)           | 1738   | 0.003 | 638454   | 353981   | 474226    | 495251   | 653409   |
| Glutaric acid (2TMS)               | 743    | 0.000 | 2499414  | 1357734  | 946745    | 458346   | 263198   |
| Alanine, beta- (3TMS)              | 239    | 0.000 | 479490   | 1071464  | 1933628   | 981626   | 750017   |
| Aspartic acid (2TMS)               | 5960   | 0.000 | 345423   | 3691717  | 4491349   | 539090   | 172868   |
| Glycerol (3TMS)                    | 753    | 0.000 | 2989     | 4929     | 27787     | 56284    | 152444   |
| Pyroglutamic acid (1TMS)           | 7405   | 0.000 | 40749853 | 50016030 | 109095242 | 82265157 | 77907984 |
| Butanoic acid, 4-amino-(3TMS)      | 119    | 0.006 | 4815536  | 16410938 | 32433703  | 22673307 | 22398740 |
| Glutamic acid (2TMS)               | 33032  | 0.000 | 4342446  | 13063157 | 13634291  | 3038576  | 3195621  |
| Phenylalanine (1TMS)               | 6140   | 0.000 | 3471604  | 11577552 | 7458293   | 916239   | 499763   |
| Glutaric acid, 2-hydroxy-(3TMS)    | 43     | 0.000 | 24892    | 17287    | 31343     | 118741   | 72802    |
| Glutaric acid, 2-oxo- (2TMS)       | 51     | 0.000 | 2095     | 23873    | 91507     | 54060    | 64188    |
| Valeric acid, 5-amino- (3TMS)      | 138    | 0.000 | 59315256 | 46642888 | 27636990  | 7400527  | 3337646  |
| Putrescine, N-acetyl- (2TMS)       | 122356 | 0.000 | 586105   | 853807   | 3432947   | 2222735  | 2536749  |

|                                      |        |       |          |          |          |          |          |
|--------------------------------------|--------|-------|----------|----------|----------|----------|----------|
| Glyceric acid-2,3-diphosphate (5TMS) | 61     | 0.018 | 280979   | 268967   | 528840   | 377454   | 252331   |
| Dodecanoic acid (1TMS)               | 3893   | 0.003 | 190843   | 237440   | 181019   | 91555    | 125251   |
| Pyrophosphate (4TMS)                 | 644102 | 0.000 | 26762    | 826      | 2582     | 113555   | 169483   |
| Adenine (2TMS)                       | 190    | 0.000 | 577161   | 456937   | 455737   | 641773   | 607581   |
| Arabinose (4TMS)                     | 66308  | 0.028 | 193804   | 433765   | 804506   | 491256   | 491164   |
| Ribitol (5TMS)                       | 6912   | -     | 8513522  | 8721038  | 10651634 | 8368441  | 8534133  |
| Glycerol-2-phosphate (4TMS)          | 2526   | 0.000 | 3314370  | 1204074  | 3764293  | 4713054  | 5250977  |
| Putrescine (4TMS)                    | 1045   | 0.000 | 8393094  | 2492419  | 18681265 | 25517020 | 25519803 |
| Ornithine (3TMS)                     | 6262   | 0.000 | 407      | 293      | 47797    | 1162686  | 432736   |
| Glycerol-3-phosphate (4TMS)          | 754    | 0.021 | 13088025 | 11380015 | 19492783 | 18501298 | 17202024 |
| Ethanolaminephosphate (4TMS)         | 1015   | 0.000 | 14689107 | 7688300  | 12771541 | 16812160 | 14008568 |
| Glutamic acid, N-acetyl- (2TMS)      | 185    | 0.000 | 397390   | 74199    | 306296   | 179031   | 301800   |
| Citric acid (4TMS)                   | 311    | 0.000 | 420714   | 594322   | 1788555  | 1405172  | 1622701  |
| Cadaverine (4TMS)                    | 273    | 0.000 | 1323577  | 291697   | 1748473  | 1642258  | 620031   |
| Tetradecanoic acid (1TMS)            | 11005  | 0.040 | 105785   | 172966   | 338271   | 223445   | 202978   |
| N- $\alpha$ -Acetyl-L-Lysine (3TMS)  | 192590 | 0.000 | 2075     | 5336     | 7676     | 2262459  | 1187207  |
| Tagatose (5TMS)                      | 92092  | 0.000 | 216546   | 110432   | 106793   | 177658   | 622211   |
| Tyrosine (2TMS)                      | 6057   | 0.000 | 1207997  | 395267   | 1315820  | 1451477  | 1646766  |

|                                     |          |       |         |          |          |          |          |
|-------------------------------------|----------|-------|---------|----------|----------|----------|----------|
| Gluconic acid, 2-oxo- (5TMS)        | 3035456  | 0.000 | 525892  | 297676   | 403646   | 360416   | 1846591  |
| Glucose (5TMS)                      | 5793     | 0.000 | 1759678 | 1174804  | 2893401  | 3511934  | 4146328  |
| Mannose (5TMS)                      | 18950    | 0.000 | 266543  | 221864   | 528996   | 431618   | 692419   |
| Mannitol (6TMS)                     | 6251     | 0.000 | 2117057 | 1099573  | 2305694  | 2947892  | 2586524  |
| Erythrose-4-phosphate (4TMS)        | 122357   | 0.000 | 3498    | 1155     | 5377     | 130910   | 586506   |
| Ribulose-5-phosphate (5TMS)         | 53477706 | 0.000 | 7316    | 5198     | 9506     | 246705   | 1386223  |
| Pantothenic acid, D- (3TMS)         | 6613     | 0.000 | 1033    | 1025     | 6253     | 63285    | 42498    |
| Hexadecenoic acid, 9-(Z)-<br>(1TMS) | 5282743  | 0.000 | 141508  | 1296361  | 5071257  | 1814586  | 1387204  |
| Hexadecanoic acid (1TMS)            | 985      | 0.013 | 6921737 | 16319838 | 31587729 | 21533357 | 24323339 |
| Galactose (1MEOX) (5TMS)            | 439357   | 0.000 | 250123  | 52654    | 120408   | 425678   | 403157   |
| Heptadecanoic acid (1TMS)           | 10465    | 0.575 | 21631   | 30090    | 39849    | 24118    | 24058    |
| Octadecanoic acid (1TMS)            | 5281     | 0.000 | 3718796 | 4788161  | 7319700  | 9296432  | 12231961 |

\* One-way ANOVA was used for the significance analysis among different Fe- and Ga-treatment groups. The value of 0.000 represents  $p$ -value < 0.001.

**Table S4.** Regulations of genes coding for *P. aeruginosa* virulence factors

| Gene Name   | ACE/Ctrl* | Ga/Ctrl* | (Ga+ACE)/Ctrl* | Gene Description                                       |
|-------------|-----------|----------|----------------|--------------------------------------------------------|
| <i>algC</i> | -0.1192   | -0.6013  | -1.2668        | Phosphomannomutase/phosphoglucomutase                  |
| <i>aprA</i> | -0.0488   | -0.0266  | -1.3037        | Alkaline metalloproteinase                             |
| <i>estA</i> | -0.6046   | -2.2565  | -2.2492        | Esterase                                               |
| <i>exoS</i> | 0.0950    | -0.0571  | -0.0440        | Exoenzyme S                                            |
| <i>exoT</i> | -0.2084   | -0.7695  | -1.0850        | Exoenzyme T                                            |
| <i>exoY</i> | -0.7161   | -0.4077  | -1.8191        | Adenylate cyclase                                      |
| <i>lasA</i> | 0.6166    | -1.7160  | -2.1766        | Protease LasA                                          |
| <i>lasB</i> | -0.1910   | -50.79   | -7.6126        | Elastase                                               |
| <i>phnA</i> | -0.2437   | -1.0969  | -2.8696        | Anthranilate synthase component 1, pyocyanine specific |
| <i>phnB</i> | -0.3937   | -0.9703  | -2.8338        | Anthranilate synthase component 2, pyocyanine specific |
| <i>phzS</i> | 1.6957    | -0.5544  | -3.1673        | 5-methylphenazine-1-carboxylate 1-monooxygenase        |
| <i>plcB</i> | 0.7514    | -2.4203  | -1.5395        | Phospholipase C                                        |
| <i>pldA</i> | 0.0076    | -1.5699  | -1.8963        | Phospholipase D                                        |
| <i>pqsE</i> | 0.1459    | -0.6515  | -2.4149        | Thioesterase PqsE                                      |
| <i>pslA</i> | 0.0331    | -1.1019  | -1.0312        | Biofilm formation protein PslA                         |
| <i>pslE</i> | 0.0145    | -0.4848  | -1.1650        | Biofilm formation protein PslE                         |
| <i>pslF</i> | 0.8308    | -0.0152  | -1.4060        | Biofilm formation protein PslF                         |
| <i>pslG</i> | 0.2870    | -0.9455  | -1.2112        | Biofilm formation protein PslG                         |

|             |         |         |         |                                                  |
|-------------|---------|---------|---------|--------------------------------------------------|
| <i>pslH</i> | 0.5417  | -0.4595 | -1.7266 | Biofilm formation protein PslH                   |
| <i>pvdA</i> | 0.1932  | 0.0780  | -0.7533 | L-ornithine N5-oxygenase                         |
| <i>pvdE</i> | -0.0546 | -1.0867 | -1.7221 | Pyoverdine biosynthesis protein PvdE             |
| <i>pvdF</i> | -0.0559 | -0.6396 | -1.9008 | Pyoverdine synthetase F                          |
| <i>pvdH</i> | 0.2229  | -1.1965 | -2.4316 | Diaminobutyrate--2-oxoglutarate aminotransferase |
| <i>pvdL</i> | 0.0294  | -1.3385 | -1.5700 | Peptide synthase                                 |
| <i>pvdS</i> | 0.3218  | 2.1103  | -1.5057 | Pyoverdine biosynthesis and secreted toxins      |
| <i>rhlA</i> | -0.1007 | -0.4057 | -2.1187 | 3-(3-hydroxydecanoyloxy)decanoate synthase       |
| <i>rhlI</i> | -0.1879 | -0.2580 | -1.0262 | Acyl-homoserine-lactone synthase                 |
| <i>rhlR</i> | 0.0714  | -0.3066 | -1.0411 | Regulatory protein RhlR                          |
| <i>toxA</i> | 0.4642  | -3.6282 | -3.6614 | Exotoxin A                                       |

\* Values displayed as log<sub>2</sub> fold changes over untreated control group.



**Table S5.** Significantly regulated gene transcripts in *P. aeruginosa* upon acetate treatment

| Gene Name     | ACE/Ctrl* | Regulation | Gene Description                                         |
|---------------|-----------|------------|----------------------------------------------------------|
| <i>PA2010</i> | 5.5126    | Up         | Transcriptional regulator                                |
| <i>hpd</i>    | 5.6272    | Up         | 4-hydroxyphenylpyruvate dioxygenase                      |
| <i>maiA</i>   | 5.0877    | Up         | Maleylacetoacetate isomerase                             |
| <i>phhA</i>   | 4.7925    | Up         | Phenylalanine 4-monooxygenase                            |
| <i>PA5106</i> | 4.5154    | Up         | N-formimino-L-glutamate deiminase                        |
| <i>hmgA</i>   | 4.1557    | Up         | Homogentisate 1,2-dioxygenase                            |
| <i>PA1137</i> | 3.9316    | Up         | Oxidoreductase                                           |
| <i>phhC</i>   | 3.0067    | Up         | Aromatic amino acid aminotransferase                     |
| <i>PA0534</i> | 2.8890    | Up         | Hypothetical protein                                     |
| <i>hutH</i>   | 2.6638    | Up         | Histidine ammonia-lyase                                  |
| <i>hutC</i>   | 2.6119    | Up         | Histidine utilization repressor HutC                     |
| <i>PA3860</i> | 2.4457    | Up         | Acyl-CoA synthetase                                      |
| <i>aroP2</i>  | 2.3159    | Up         | Aromatic amino acid transporter AroP                     |
| <i>PA0530</i> | 2.3036    | Up         | Class III pyridoxal phosphate-dependent aminotransferase |
| <i>phzB1</i>  | 2.2069    | Up         | Phenazine biosynthesis protein                           |
| <i>dhcB</i>   | 2.1538    | Up         | Dehydrocarnitine CoA transferase subunit B               |
| <i>PA0187</i> | 2.1026    | Up         | Hypothetical protein                                     |
| <i>PA0529</i> | 2.0974    | Up         | Hypothetical protein                                     |

|               |         |      |                                           |
|---------------|---------|------|-------------------------------------------|
| <i>atoB</i>   | 2.0790  | Up   | Acetyl-CoA acetyltransferase              |
| <i>hutU</i>   | 2.0003  | Up   | Urocanate hydratase                       |
| <i>PA4130</i> | -2.1208 | Down | Sulfite/nitrite reductase                 |
| <i>mdcA</i>   | -2.1258 | Down | Malonate decarboxylase subunit alpha      |
| <i>mdcE</i>   | -2.2215 | Down | Malonate decarboxylase subunit gamma      |
| <i>PA0215</i> | -2.2592 | Down | Malonate transporter MadL                 |
| <i>metE</i>   | -2.4178 | Down | 5-methyltetrahydropteroyltriglutamate     |
| <i>PA0216</i> | -2.6761 | Down | Malonate transporter MadM                 |
| <i>PA3568</i> | -3.0708 | Down | Propionyl-CoA synthetase                  |
| <i>PA3710</i> | -3.2033 | Down | GMC-type oxidoreductase                   |
| <i>mmsA</i>   | -3.2550 | Down | Methylmalonate-semialdehyde dehydrogenase |
| <i>mmsB</i>   | -3.4503 | Down | 3-hydroxyisobutyrate dehydrogenase        |
| <i>PA3709</i> | -3.8141 | Down | Major facilitator superfamily transporter |
| <i>PA4133</i> | -4.0199 | Down | Cbb3-type cytochrome C oxidase subunit I  |

\* Values displayed as log<sub>2</sub> fold change. Only gene transcriptions with fold change > 4 and adjusted *p*-value < 0.05 are listed.

**Table S6.** NTFD analysis of metabolites labeled by  $^{13}\text{C}$  in the presence of  $[\text{U-}^{13}\text{C}_2]$  acetate.

| Metabolite             | RT<br>Unlabeled | RT<br>Labeled | Frag | M+0 (%) | M+1 (%) | M+2 (%) | M+3 (%) | M+4 (%) | M+5 (%) | M+6 (%) |
|------------------------|-----------------|---------------|------|---------|---------|---------|---------|---------|---------|---------|
| Lactic acid            | 6.0127          | 5.9888        | 219  | 94.76   | 3.32    | 2.29    | 0.25    |         |         |         |
| Alanine                | 6.9749          | 6.9511        | 116  | 90.98   | 7.59    | 1.47    | -0.05   |         |         |         |
|                        |                 |               | 218  | 93.51   | 3.69    | 2.92    | 0.31    |         |         |         |
| Valine                 | 9.7613          | 9.7492        | 156  | 75.36   | 9.96    | 10.73   | 4.22    | 1.95    | 0.08    |         |
| Proline                | 11.8629         | 11.8626       | 142  | 74.91   | 9.51    | 9.43    | 5.05    | 0.83    | 1.33    |         |
| Succinic acid          | 12.3647         | 12.3644       | 172  | 65.75   | 16.43   | 14.21   | 3.69    | 0.12    |         |         |
|                        |                 |               | 247  | 65.50   | 17.90   | 12.31   | 3.74    | 0.73    |         |         |
| Uracil                 | 12.9136         | 12.9075       | 255  | 39.81   | 29.51   | 17.55   | 16.37   | 5.83    |         |         |
| Fumaric acid           | 13.3328         | 13.3326       | 245  | 72.54   | 14.57   | 9.17    | 3.26    | 0.61    |         |         |
| Serine                 | 13.5571         | 13.5569       | 204  | 94.42   | 5.66    | -0.02   | -0.05   |         |         |         |
| Threonine              | 14.2006         | 14.2003       | 57   | 92.50   | 5.63    | 5.89    | -2.82   | -2.71   |         |         |
|                        |                 |               | 117  | 92.01   | 4.64    | 3.60    | -0.08   | -0.17   |         |         |
|                        |                 |               | 291  | 90.53   | 5.03    | 4.87    | -0.90   | 0.62    |         |         |
| Thymine                | 14.5194         | 14.5073       | 197  | 41.40   | 32.51   | 21.30   | 6.63    | -1.60   | -0.64   |         |
|                        |                 |               | 270  | 37.85   | 31.34   | 20.46   | 9.15    | 1.34    | 0.07    |         |
| beta-Alanine           | 15.2454         | 15.2452       | 160  | 91.13   | 5.28    | 1.20    | 2.86    |         |         |         |
| GABA                   | 17.7485         | 17.7423       | 246  | 79.28   | 10.19   | 7.78    | 2.64    | 0.42    |         |         |
|                        |                 |               | 304  | 78.32   | 11.13   | 7.58    | 2.39    | 0.59    |         |         |
| Glycyl-L-Glutamic acid | 17.8311         | 17.8250       | 84   | 60.15   | 22.61   | 13.16   | 3.84    | 0.76    | 0.01    | 0.01    |
|                        |                 |               | 186  | 56.51   | 18.78   | 17.51   | 5.62    | 1.94    | 0.37    | 0.02    |
|                        |                 |               | 276  | 56.85   | 17.77   | 17.61   | 4.92    | 2.17    | 0.01    | 0.90    |
| 2-Hydroxyglutaric acid | 18.8878         | 18.8876       | 129  | 65.03   | 25.72   | 8.85    | -0.13   | 5.82    | -3.49   |         |
| Glutamic acid          | 19.9563         | 19.9502       | 84   | 63.47   | 19.18   | 15.47   | 3.92    | -0.63   | 0.13    |         |

|                              |         |         |     |       |       |       |       |       |       |       |
|------------------------------|---------|---------|-----|-------|-------|-------|-------|-------|-------|-------|
|                              |         |         | 156 | 62.89 | 18.52 | 13.89 | 4.53  | 1.58  | -0.07 |       |
|                              |         |         | 230 | 62.96 | 18.72 | 13.61 | 4.08  | 0.75  | -0.03 |       |
|                              |         |         | 246 | 64.52 | 17.23 | 13.70 | 4.07  | 0.59  | -0.11 |       |
|                              |         |         | 320 | 62.55 | 18.52 | 13.89 | 4.30  | 0.90  | -0.06 |       |
| Putrescine                   | 22.4475 | 22.4709 | 200 | 94.54 | 2.12  | 2.15  | 1.06  | 0.22  |       |       |
|                              |         |         | 214 | 94.56 | 2.05  | 2.15  | 1.01  | 0.28  |       |       |
| Glycerol-2-phosphate         | 23.0555 | 23.0612 | 129 | 91.05 | 4.55  | 5.50  | 0.28  |       |       |       |
|                              |         |         | 256 | 94.61 | 5.25  | 0.06  | 0.06  |       |       |       |
|                              |         |         | 357 | 92.39 | 4.09  | 3.60  | -0.04 |       |       |       |
| Glutamine                    | 23.2740 | 23.2737 | 245 | 61.72 | 18.47 | 12.32 | 5.87  | 1.57  | 0.17  |       |
|                              |         |         | 347 | 56.24 | 18.20 | 13.14 | 8.96  | 3.94  | -0.05 |       |
| Ethanolamine<br>phosphate    | 23.4215 | 23.4272 | 100 | 94.09 | 6.92  | 1.48  |       |       |       |       |
| Cytidine<br>monophosphate    | 23.6577 | 23.6633 | 111 | 84.96 | 1.94  | 0.28  | 4.17  | 4.24  | 1.36  | 5.78  |
| Hypoxanthine                 | 23.8407 | 23.8404 | 193 | 67.71 | 16.86 | 10.77 | 5.49  | 0.97  | 0.16  |       |
| Ornithine                    | 24.1831 | 24.1769 | 420 | 62.34 | 13.03 | 15.51 | 6.21  | 2.61  | 0.60  |       |
| Citric acid                  | 24.2362 | 24.2419 | 273 | 60.70 | 21.46 | 14.27 | 3.52  | 0.45  | -0.05 | 0.02  |
| Cadaverine                   | 24.5254 | 24.5370 | 174 | 93.43 | 5.42  | 1.60  | -0.37 | -0.08 | -0.01 |       |
| Tyrosine                     | 26.6093 | 26.6091 | 192 | 93.41 | 4.64  | 1.38  | -0.16 | 0.32  | -0.15 | 0.02  |
| Xanthine                     | 28.1147 | 28.1085 | 353 | 65.67 | 26.70 | 4.55  | 0.50  | 1.57  | -0.09 |       |
|                              |         |         | 368 | 62.34 | 28.82 | 7.38  | 1.02  | 0.01  | 0.34  |       |
| Uridine-5'-<br>monophosphate | 28.2032 | 28.2030 | 169 | 78.51 | 11.45 | 6.61  | 2.76  | 0.47  | 0.95  | 0.01  |
|                              |         |         | 243 | 79.76 | 12.03 | 5.66  | 2.23  | 0.42  | 0.04  | 0.01  |
|                              |         |         | 258 | 77.23 | 12.81 | 7.04  | 2.38  | 0.62  | 0.14  | 0.22  |
| Palmitelaidic acid           | 28.3213 | 28.3151 | 129 | 52.40 | 21.02 | 17.44 | 17.49 | -2.14 | 0.87  | -3.91 |
| Hexadecanoic acid            | 28.7463 | 28.7461 | 299 | 92.67 | 0.27  | -0.03 | 0.14  | 2.11  | 1.02  | 2.24  |
| Ribofuranose-5-<br>phosphate | 28.9825 | 28.9940 | 217 | 84.74 | 12.04 | 3.18  | -0.10 | 0.38  | 0.27  |       |

|                         |         |         |     |       |       |       |       |       |       |       |
|-------------------------|---------|---------|-----|-------|-------|-------|-------|-------|-------|-------|
| D-Galactose             | 30.3756 | 30.3577 | 160 | 94.92 | 4.23  | 0.73  | 0.42  | -0.33 | -0.02 | 0.01  |
| (E)-9-Octadecenoic acid | 31.9223 | 31.9220 | 129 | 46.29 | 23.35 | 20.25 | 19.51 | -4.02 | 0.98  | 0.01  |
|                         |         |         | 145 | 47.94 | 24.62 | 26.74 | 11.27 | -2.88 | -2.39 | -2.26 |
| Octadecanoic acid       | 32.2293 | 32.2290 | 231 | 33.08 | 23.28 | 22.04 | 17.06 | 2.74  | 1.35  | 0.56  |
|                         |         |         | 319 | 35.57 | 23.55 | 23.42 | 15.93 | 2.50  | 0.68  | -0.23 |
| Kinurenic acid          | 33.2446 | 33.2503 | 230 | 29.08 | 23.42 | 24.16 | 18.70 | 3.06  | 1.48  | 0.76  |
|                         |         |         | 304 | 29.68 | 41.32 | 20.29 | 5.71  | 2.64  | 1.03  | 0.02  |
| D-Fructose-phosphate    | 33.3214 | 33.3211 | 129 | 94.44 | 4.38  | 2.48  | -0.67 | 4.97  | -4.78 | 0.01  |
|                         |         |         | 449 | 88.45 | 11.51 | 1.91  | -1.07 | -0.40 | 0.17  | -0.94 |
| Glucose-6-phosphate     | 33.5162 | 33.5160 | 247 | 93.77 | 3.46  | 1.14  | -0.84 | -3.16 | 1.47  | 3.32  |
| Hexadecanoic acid       | 37.8374 | 37.8313 | 371 | 76.76 | -2.12 | 3.61  | 0.96  | 5.97  | 2.52  | 9.77  |

**Table S7.** NTFD analysis of metabolites labeled by  $^{13}\text{C}$  in the presence of  $[\text{U-}^{13}\text{C}_2]$  acetate and gallium.

| Metabolite        | RT<br>Unlabeled | RT<br>Labeled | Frag | M+0 (%) | M+1 (%)      | M+2 (%)      | M+3 (%) | M+4 (%) | M+5 (%) | M+6 (%) |
|-------------------|-----------------|---------------|------|---------|--------------|--------------|---------|---------|---------|---------|
| Lactic acid       | 5.9890          | 6.0302        | 219  | 94.97   | 2.93         | 1.85         | 0.24    |         |         |         |
| Alanine           | 6.9513          | 6.9866        | 116  | 94.49   | 5.05         | 0.48         | 0.02    |         |         |         |
|                   |                 |               | 218  | 92.01   | 6.48         | 0.93         | -0.50   |         |         |         |
| Valine            | 9.7494          | 9.7670        | 156  | 90.16   | 2.96         | 5.61         | 1.67    | 1.38    | 0.89    |         |
| Proline           | 11.8569         | 11.8627       | 142  | 90.60   | 2.90         | 4.17         | 1.05    | 0.26    | 2.00    |         |
| Succinic acid     | 12.3646         | 12.3645       | 172  | 69.08   | 9.99         | <b>17.79</b> | 4.67    | -0.74   |         |         |
|                   |                 |               | 247  | 68.47   | 9.56         | <b>18.00</b> | 3.81    | 0.32    |         |         |
| Uracil            | 12.9077         | 12.9135       | 255  | 95.00   | 5.21         | 0.55         | 0.41    | 0.38    |         |         |
| Fumaric acid      | 13.3327         | 13.3326       | 245  | 80.81   | 6.46         | <b>10.56</b> | 2.08    | 0.28    |         |         |
| Serine            | 13.5571         | 13.5569       | 204  | 94.71   | 5.15         | 0.19         | -0.02   |         |         |         |
| Threonine         | 14.2005         | 14.2004       | 57   | 89.80   | 6.70         | 9.20         | -3.79   | -3.81   |         |         |
|                   |                 |               | 117  | 90.52   | 4.94         | 4.71         | -0.10   | -0.06   |         |         |
|                   |                 |               | 291  | 91.54   | 0.85         | 8.06         | -0.93   | 0.76    |         |         |
| Thymine           | 14.5134         | 14.5192       | 197  | 92.19   | 9.92         | -2.59        | 0.02    | 0.02    | 0.01    |         |
|                   |                 |               | 270  | 94.81   | 3.49         | 1.45         | 0.05    | 0.01    | 0.27    |         |
| beta-Alanine      | 15.2395         | 15.2453       | 160  | 90.01   | 2.96         | 2.69         | 3.84    |         |         |         |
| Homoserine        | 15.8239         | 15.8238       | 218  | 71.99   | <b>16.54</b> | 9.42         | 3.28    | -0.95   |         |         |
|                   |                 |               | 230  | 68.53   | <b>12.99</b> | <b>13.24</b> | 6.50    | 0.10    |         |         |
| Pyroglutamic acid | 17.5772         | 17.5771       | 230  | 64.77   | <b>11.27</b> | <b>21.12</b> | 6.36    | -2.20   | -2.27   |         |
|                   |                 |               | 258  | 65.66   | 8.29         | <b>25.87</b> | -2.80   | 2.43    | 0.43    |         |
|                   |                 |               | 273  | 63.66   | <b>10.44</b> | <b>24.14</b> | 0.01    | 1.74    | -0.12   |         |
| GABA              | 17.7543         | 17.7542       | 246  | 77.66   | 5.84         | <b>12.99</b> | 3.09    | 0.42    |         |         |
|                   |                 |               | 304  | 75.22   | 7.67         | <b>13.98</b> | 2.80    | 0.34    |         |         |
| Glycyl-L-Glutamic | 17.8311         | 17.8309       | 84   | 63.65   | <b>13.77</b> | <b>18.98</b> | 3.89    | 0.29    | -0.03   | 0.01    |

|                          |         |         |     |       |              |              |       |       |       |       |
|--------------------------|---------|---------|-----|-------|--------------|--------------|-------|-------|-------|-------|
| acid                     |         |         | 186 | 62.42 | 9.05         | <b>22.73</b> | 3.87  | 2.18  | 0.08  | -0.23 |
|                          |         |         | 276 | 61.37 | 8.92         | <b>23.63</b> | 3.44  | 2.54  | 0.10  | 0.08  |
| 2-Hydroxyglutaric acid   | 18.8937 | 18.8935 | 129 | 64.32 | <b>29.98</b> | 8.22         | -0.96 | 4.63  | -4.96 |       |
| Glutamic acid            | 19.9563 | 19.9502 | 84  | 64.98 | <b>12.96</b> | <b>21.12</b> | 4.00  | -1.54 | 0.02  |       |
|                          |         |         | 156 | 64.24 | <b>11.98</b> | <b>19.84</b> | 4.56  | 0.69  | -0.29 |       |
|                          |         |         | 230 | 63.97 | <b>12.58</b> | <b>19.47</b> | 4.08  | 0.08  | -0.09 |       |
|                          |         |         | 246 | 64.49 | <b>10.57</b> | <b>20.87</b> | 4.06  | 0.03  | -0.02 |       |
|                          |         |         | 320 | 63.60 | <b>11.57</b> | <b>20.06</b> | 4.48  | 0.31  | 0.04  |       |
| Glutamine                | 23.2739 | 23.2797 | 245 | 63.96 | <b>12.19</b> | <b>19.41</b> | 4.17  | 0.38  | 0.01  |       |
|                          |         |         | 347 | 61.76 | 8.23         | <b>23.71</b> | 3.35  | 2.72  | 0.39  |       |
| Ethanolamine phosphate   | 23.4215 | 23.4213 | 100 | 92.19 | 1.04         | 0.06         |       |       |       |       |
| Cytidine monophosphate   | 23.6635 | 23.6634 | 111 | 91.91 | 0.36         | 3.07         | 1.01  | 2.53  | 0.45  | 3.13  |
| Hypoxanthine             | 23.8406 | 23.8405 | 193 | 94.85 | 1.89         | 3.72         | 0.54  | 0.07  | 0.01  |       |
| Ornithine                | 24.1771 | 24.1770 | 420 | 94.77 | 2.59         | 1.95         | 0.09  | 0.73  | 0.13  |       |
| Citric acid              | 24.2420 | 24.2419 | 273 | 63.38 | <b>19.13</b> | <b>13.76</b> | 3.67  | 0.99  | 0.03  | -0.84 |
| Uridine-5'-monophosphate | 28.2032 | 28.2030 | 204 | 93.47 | 0.75         | 5.71         | 0.91  | 0.23  | 0.78  | 0.01  |
| Hexadecanoic acid        | 28.7463 | 28.7461 | 299 | 94.68 | 1.99         | -0.04        | 0.04  | 0.62  | 0.76  | 1.35  |
| Ribofuranose-5-phosphate | 28.9706 | 28.9764 | 215 | 92.52 | 1.58         | -6.04        | -3.21 | -1.18 | 7.27  |       |
| D-Galactose              | 30.3697 | 30.3695 | 160 | 93.53 | 1.31         | 2.86         | 0.11  | 0.21  | 2.31  | 1.56  |
| (E)-9-Octadecenoic acid  | 31.9222 | 31.9221 | 129 | 84.65 | 6.75         | 6.81         | 6.33  | -2.79 | -0.78 | -1.83 |
|                          |         |         | 145 | 84.98 | 8.52         | 6.99         | 3.13  | -0.88 | -1.23 | -1.10 |
| Octadecanoic acid        | 32.2942 | 32.2940 | 171 | 94.95 | 4.76         | -0.27        | 1.83  | -1.17 | -0.54 | -0.08 |
|                          |         |         | 285 | 94.01 | 3.04         | -0.67        | 2.04  | 4.05  | 0.08  | -0.01 |
| Kinurenic acid           | 33.2387 | 33.2385 | 230 | 77.18 | <b>13.34</b> | 6.49         | 3.39  | 0.02  | -0.56 | 0.20  |

|                      |         |         |     |       |              |      |       |       |       |       |
|----------------------|---------|---------|-----|-------|--------------|------|-------|-------|-------|-------|
|                      |         |         | 304 | 78.23 | <b>17.96</b> | 3.62 | 0.18  | -0.08 | 0.12  | 0.01  |
| D-Fructose-phosphate | 33.3154 | 33.3153 | 129 | 91.25 | 6.15         | 6.88 | -1.42 | 3.69  | -5.03 | 0.02  |
|                      |         |         | 449 | 89.05 | 4.64         | 4.81 | 2.14  | 0.64  | -1.64 | 0.33  |
| Glucose-6-phosphate  | 33.5102 | 33.5101 | 174 | 90.07 | -2.44        | 3.47 | 2.33  | -2.35 | 9.47  | -1.98 |
| Hexadecanoic acid    | 37.8314 | 37.8313 | 371 | 83.11 | 0.01         | 2.43 | 0.38  | 3.84  | 0.73  | 3.96  |



## References

1. Y. Wang, C. N. Tsang, F. Xu, P. W. Kong, L. Hu, J. Wang, I. K. Chu, H. Li and H. Sun, *Chem. Commun.*, 2015, **51**, 16479-16482.
2. B. Peng, Y. B. Su, H. Li, Y. Han, C. Guo, Y. M. Tian and X. X. Peng, *Cell Metab.*, 2015, **21**, 249-261.
3. X. Domingo-Almenara, J. Brezmes, M. Vinaixa, S. Samino, N. Ramirez, M. Ramon-Krauel, C. Lerin, M. Diaz, L. Ibanez, X. Correig, A. Perera-Lluna and O. Yanes, *Anal. Chem.*, 2016, **88**, 9821-9829.
4. N. R. Glasser, S. E. Kern and D. K. Newman, *Mol. Microbiol.*, 2014, **92**, 399-412.
5. K. R. Allison, M. P. Brynildsen and J. J. Collins, *Nature*, 2011, **473**, 216-220.
6. S. Meylan, C. B. Porter, J. H. Yang, P. Belenky, A. Gutierrez, M. A. Lobritz, J. Park, S. H. Kim, S. M. Moskowitz and J. J. Collins, *Cell Chem. Biol.*, 2017, **24**, 195-206.
7. P. Uusitalo, U. Hagglund, E. Rhoos, H. Scherman Norberg, M. Elofsson and C. Sundin, *J Antibiot.*, 2017, **70**, 937-943.
8. X. Liao, F. Yang, R. Wang, X. He, H. Li, R. Y. T. Kao, W. Xia and H. Sun, *Chem. Sci.*, 2017, **8**, 8061-8066.
9. K. Hiller, C. M. Metallo, J. K. Kelleher and G. Stephanopoulos, *Anal. Chem.*, 2010, **82**, 6621-6628.
10. Y. B. Su, B. Peng, H. Li, Z. X. Cheng, T. T. Zhang, J. X. Zhu, D. Li, M. Y. Li, J. Z. Ye, C. C. Du, S. Zhang, X. L. Zhao, M. J. Yang and X. X. Peng, *Proc. Natl. Acad. Sci. USA*, 2018, **115**, E1578-E1587.
11. K. Hiller, A. Wegner, D. Weindl, T. Cordes, C. M. Metallo, J. K. Kelleher and G. Stephanopoulos, *Bioinformatics*, 2013, **29**, 1226-1228.
